# Supplementary material
Source: Royal Society of Chemistry journal article supplement (doi:10.1039/d6nr00162a)
Supplement: d6nr00162a1.pdf [file d6nr00162a1.pdf]

## Supplementary Material (SM)

### Symmetry-Driven Screening of Multifunctional 2D Monolayers with Valleytronic and Piezoelectric Properties: A High-Throughput Study

Fathima IS, Raihan Ahammed, Abir De Sarkar<sup>a,b,\*</sup>

<sup>a</sup>Institute of Nano Science and Technology, Knowledge City, Sector 81, Mohali, Punjab-140306, India

<sup>b</sup>Indian Institute of Technology Ropar, Rupnagar, Punjab - 140001, India

\*E-mail: [abir@inst.ac.in](mailto:abir@inst.ac.in); [abirdesarkar@gmail.com](mailto:abirdesarkar@gmail.com)

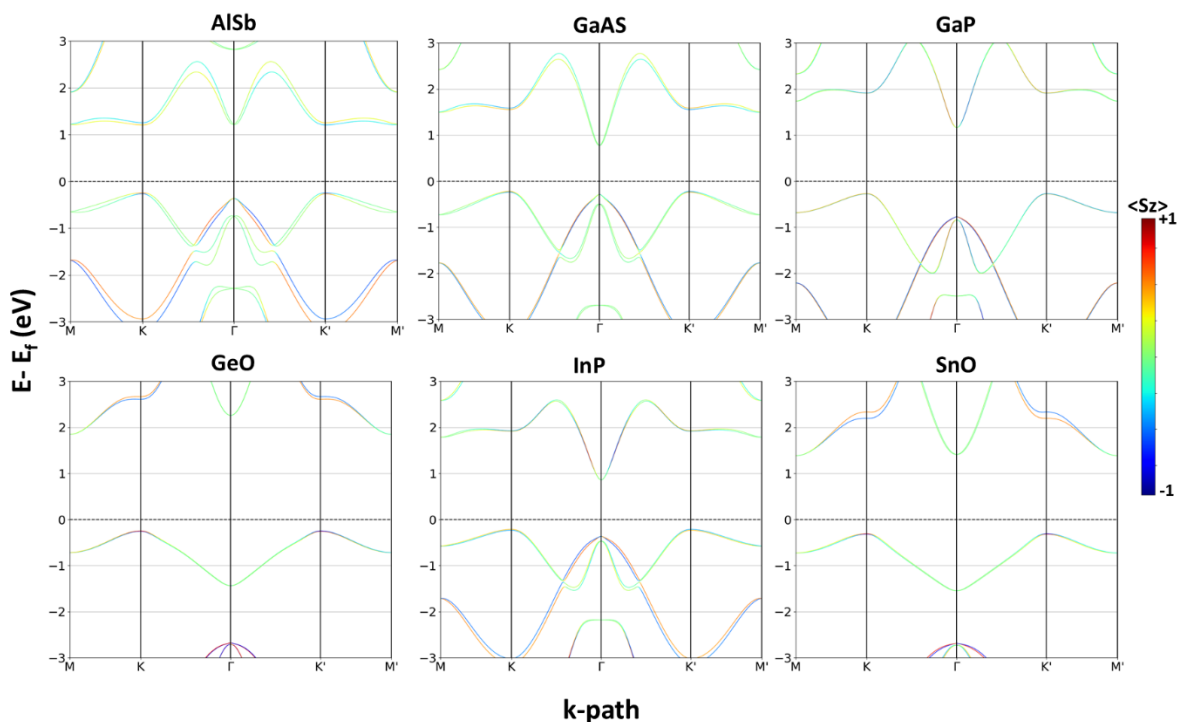

**Figure S1(a).** Spin projected (PBE+SOC) band structure corresponding to monolayers containing 2 atoms, in P3m1 space group.

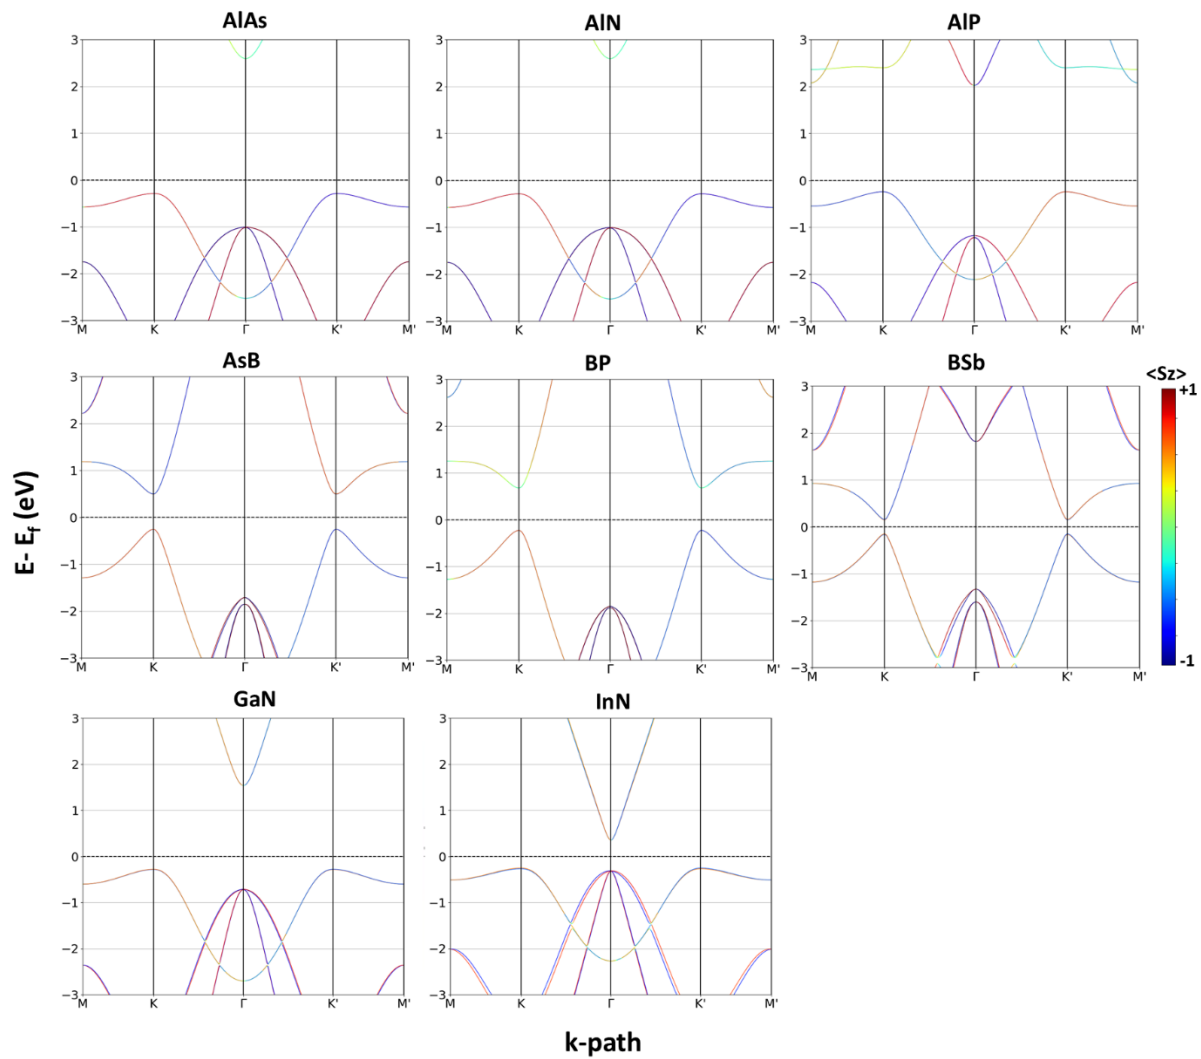

**Figure S1(b).** Spin projected (PBE+SOC) band structure corresponding to monolayers containing 2 atoms, in P-6m2 space group.

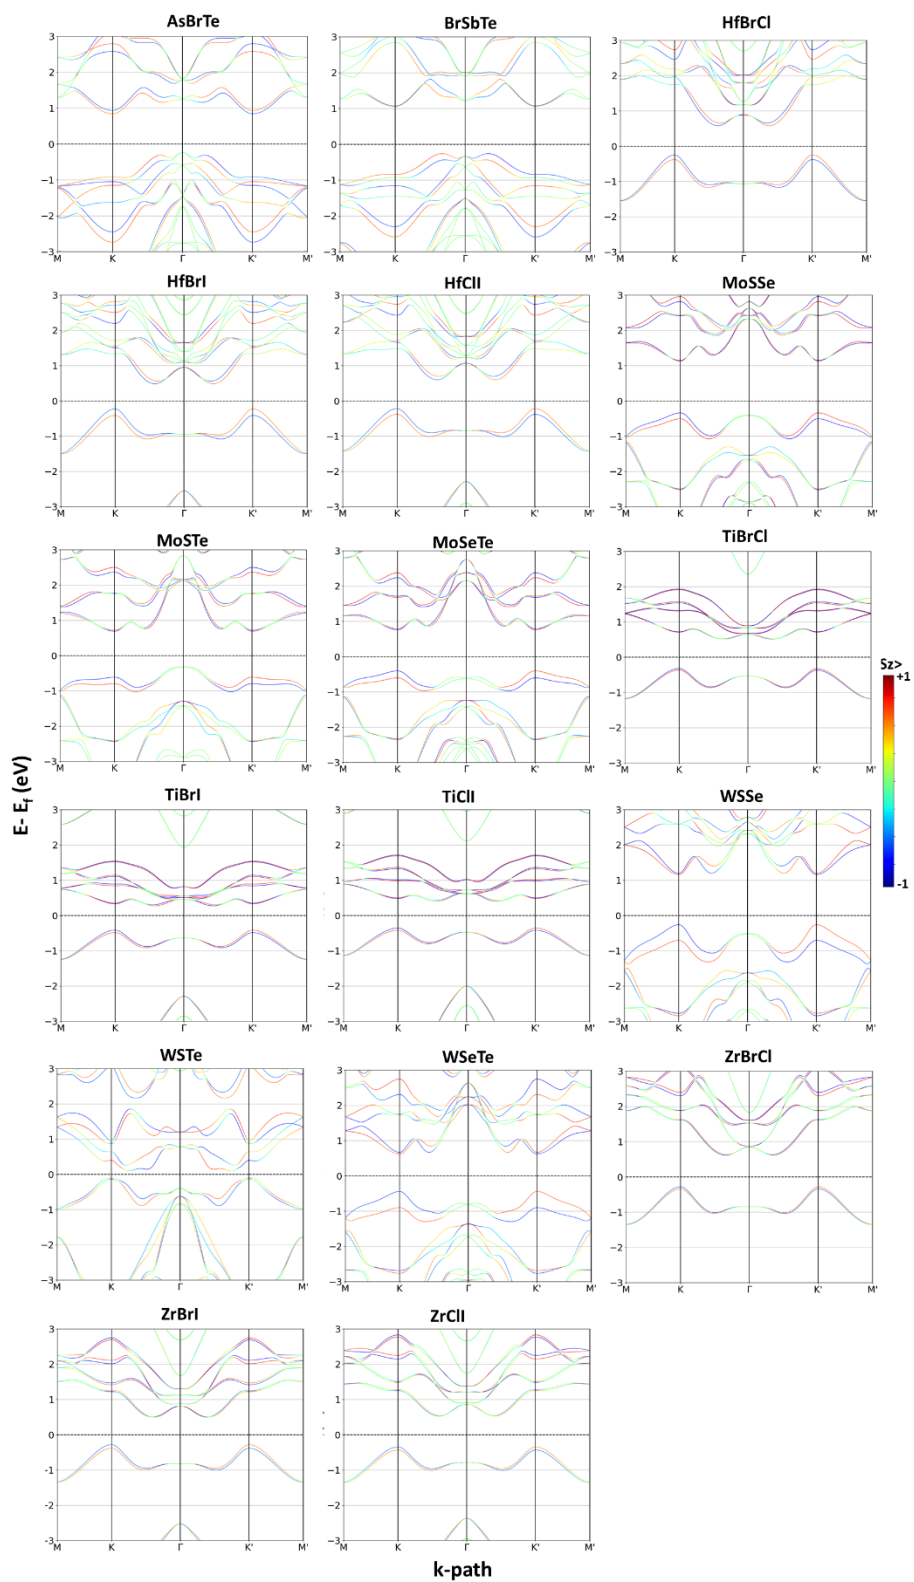

**Figure S1(c).** Spin projected (PBE+SOC) band structure corresponding to monolayers containing 3 atoms, in P-6m2 space group.

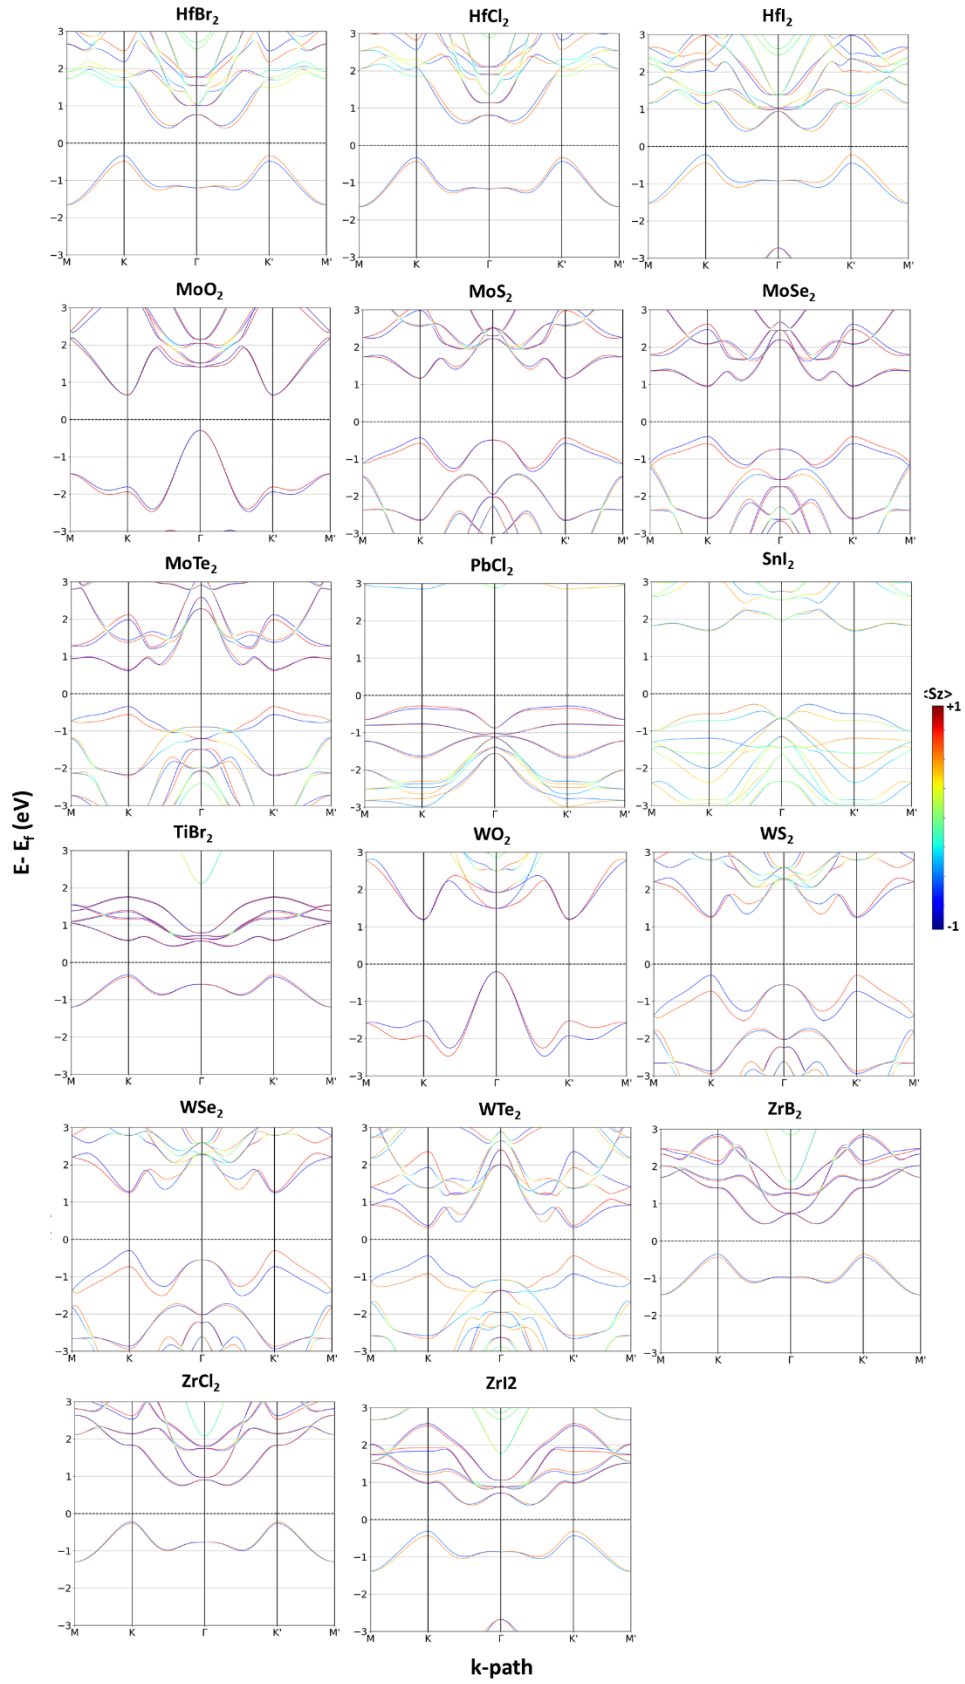

**Figure S1(d).** Spin projected (PBE+SOC) band structure corresponding to monolayers containing 3 atoms, in P-6m2 space group.

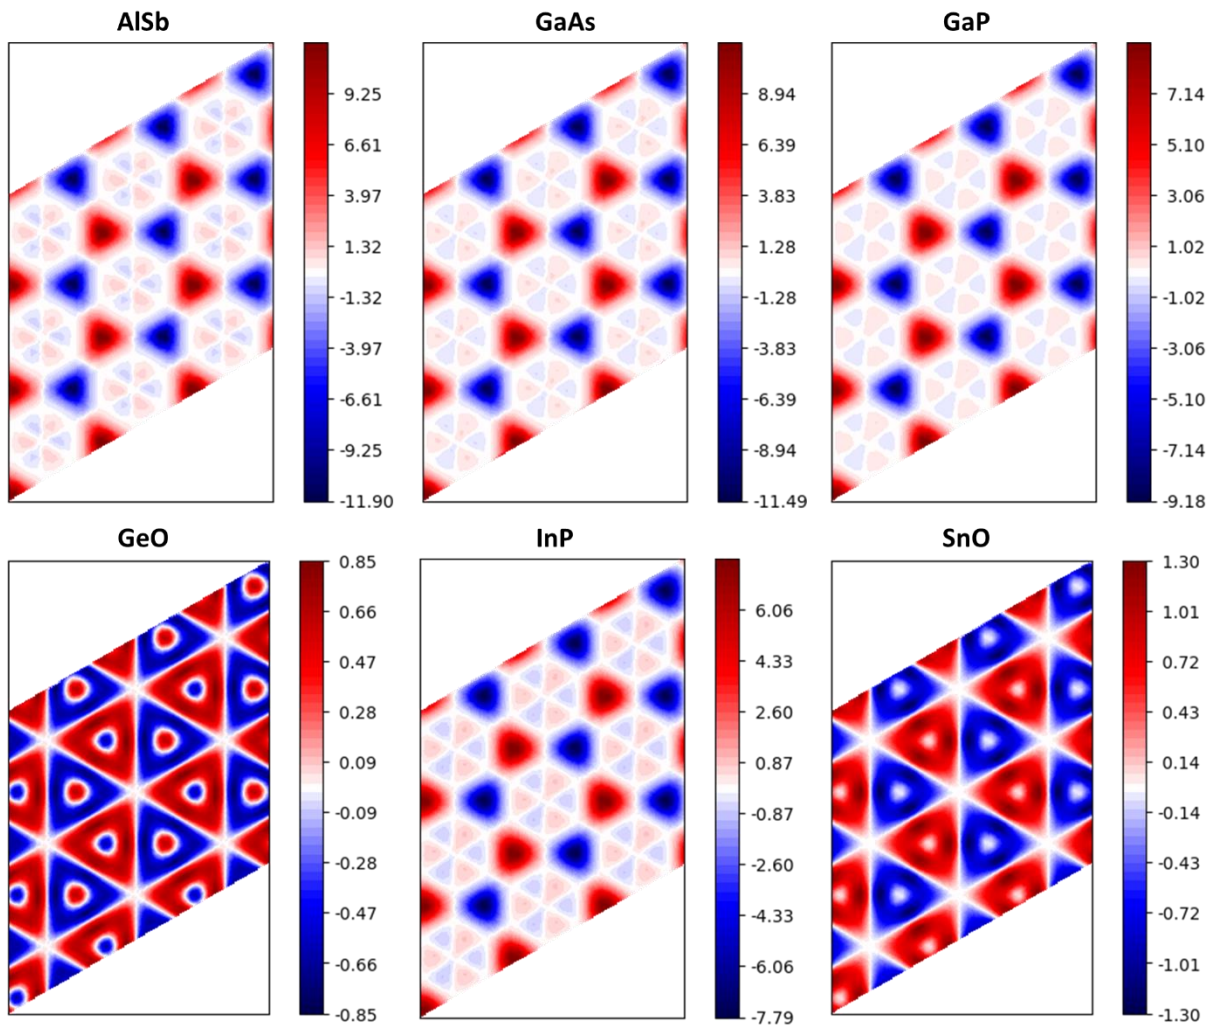

**Figure S2(a).** Contour plots of the Berry curvature distribution across the full BZ corresponding to monolayers containing 2 atoms, in P3m1 space group.

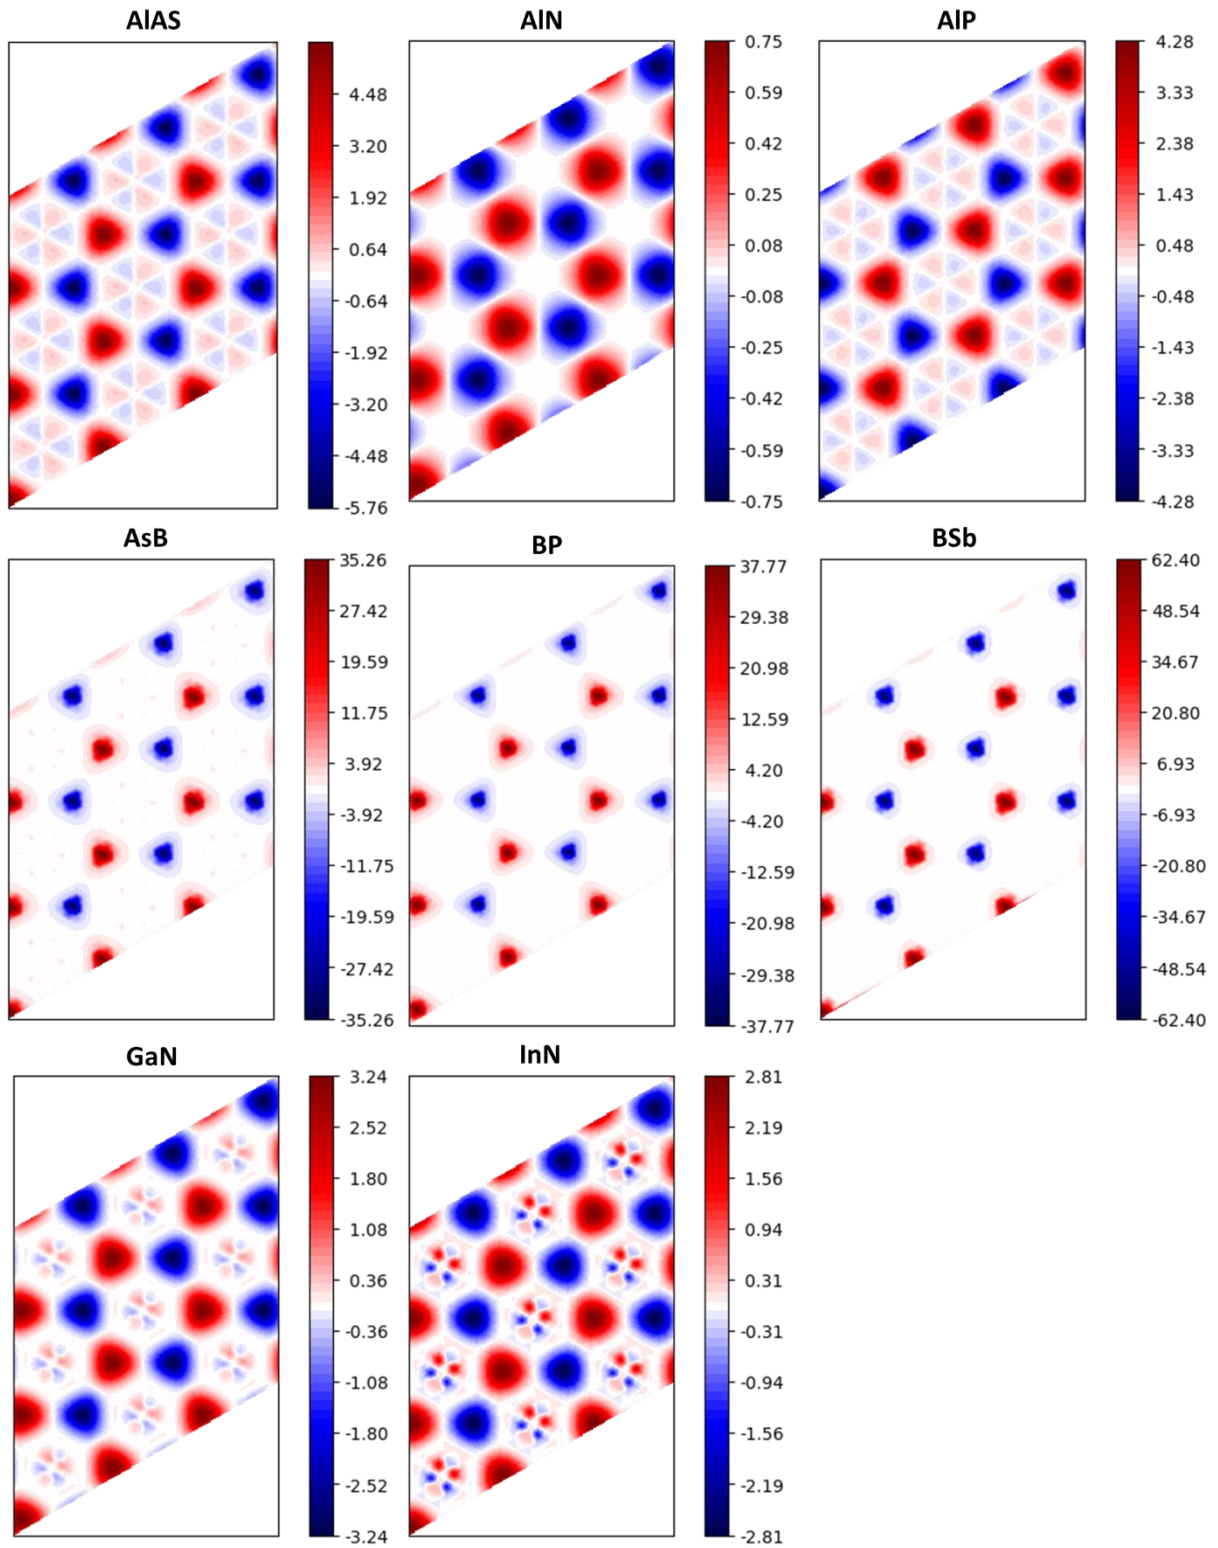

**Figure S2(b).** Contour plots of the Berry curvature distribution across the full BZ corresponding to monolayers containing 2 atoms, in P-6m2 space group.

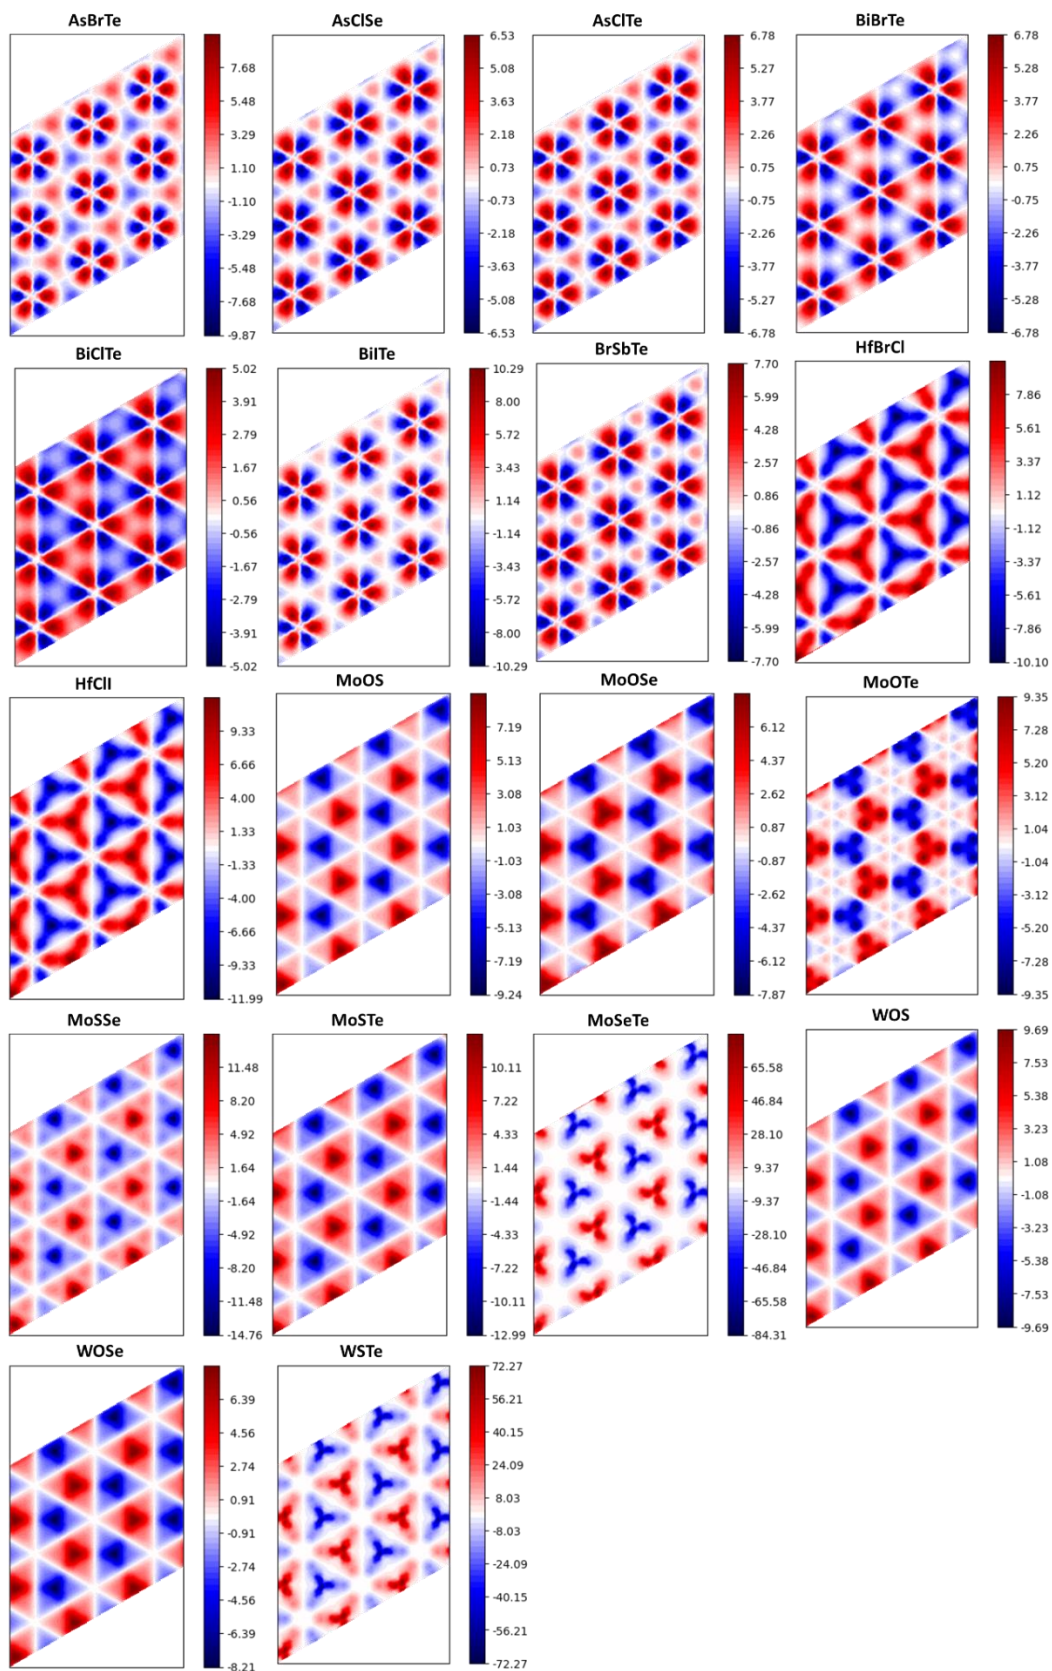

**Figure S2(c)** Contour plots of the Berry curvature distribution across the full BZ corresponding to monolayers containing 3 atoms, in P3m1 space group.

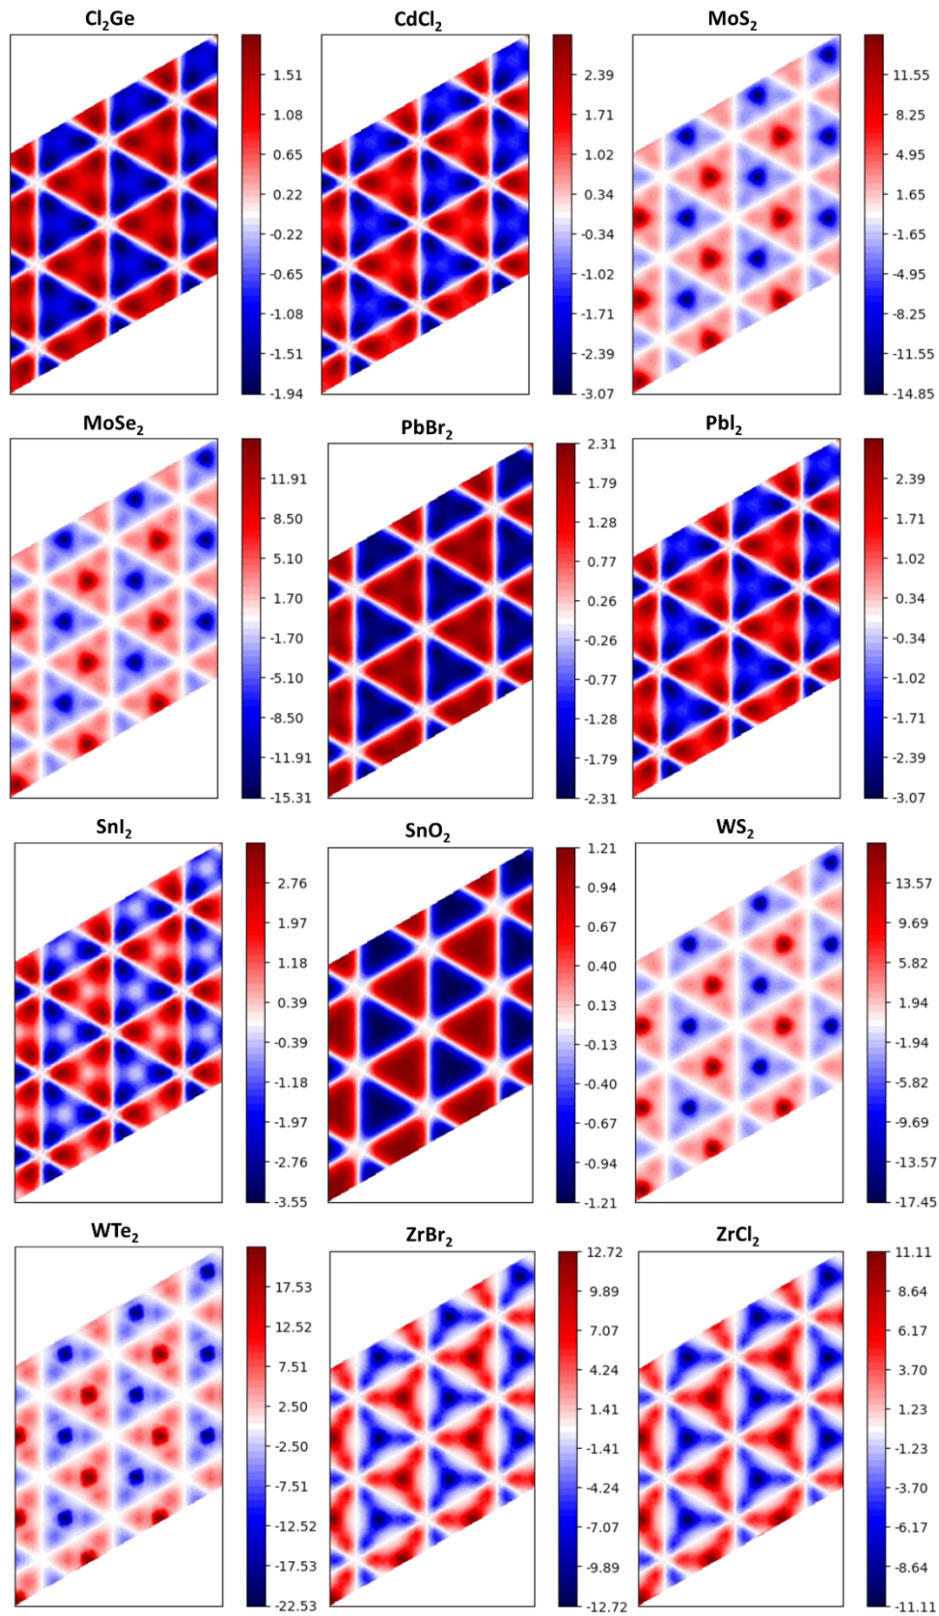

**Figure S2(d).** Contour plots of the Berry curvature distribution across the full BZ corresponding to monolayers containing 3 atoms, in P-6m2 space group.

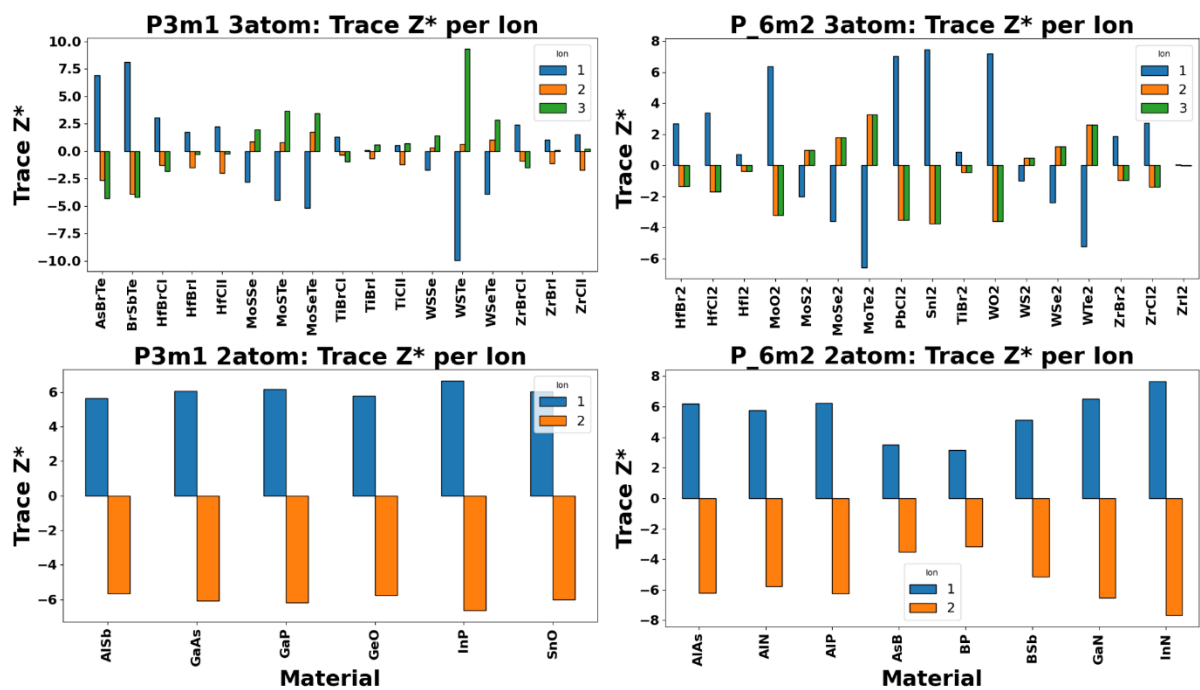

**Figure S3:** The trace of Born effective charge ( $Z^*$ ) plotted for each material, the different colour bars represent the ions present in the monolayers.
